# Supplementary material for: Tissue‐resident CD69+CXCR6+ Natural Killer cells with exhausted phenotype accumulate in human non‐small cell lung cancer
Source: PubMed Central journal article supplement — Eur J Immunol. 2022 Nov 11;52(12):1993–2005. doi: 10.1002/eji.202149608 (PMC10098621; doi:10.1002/eji.202149608), 2022-11-11
Supplement: EJI-52-1993-s001.pdf [file EJI-52-1993-s001.pdf]

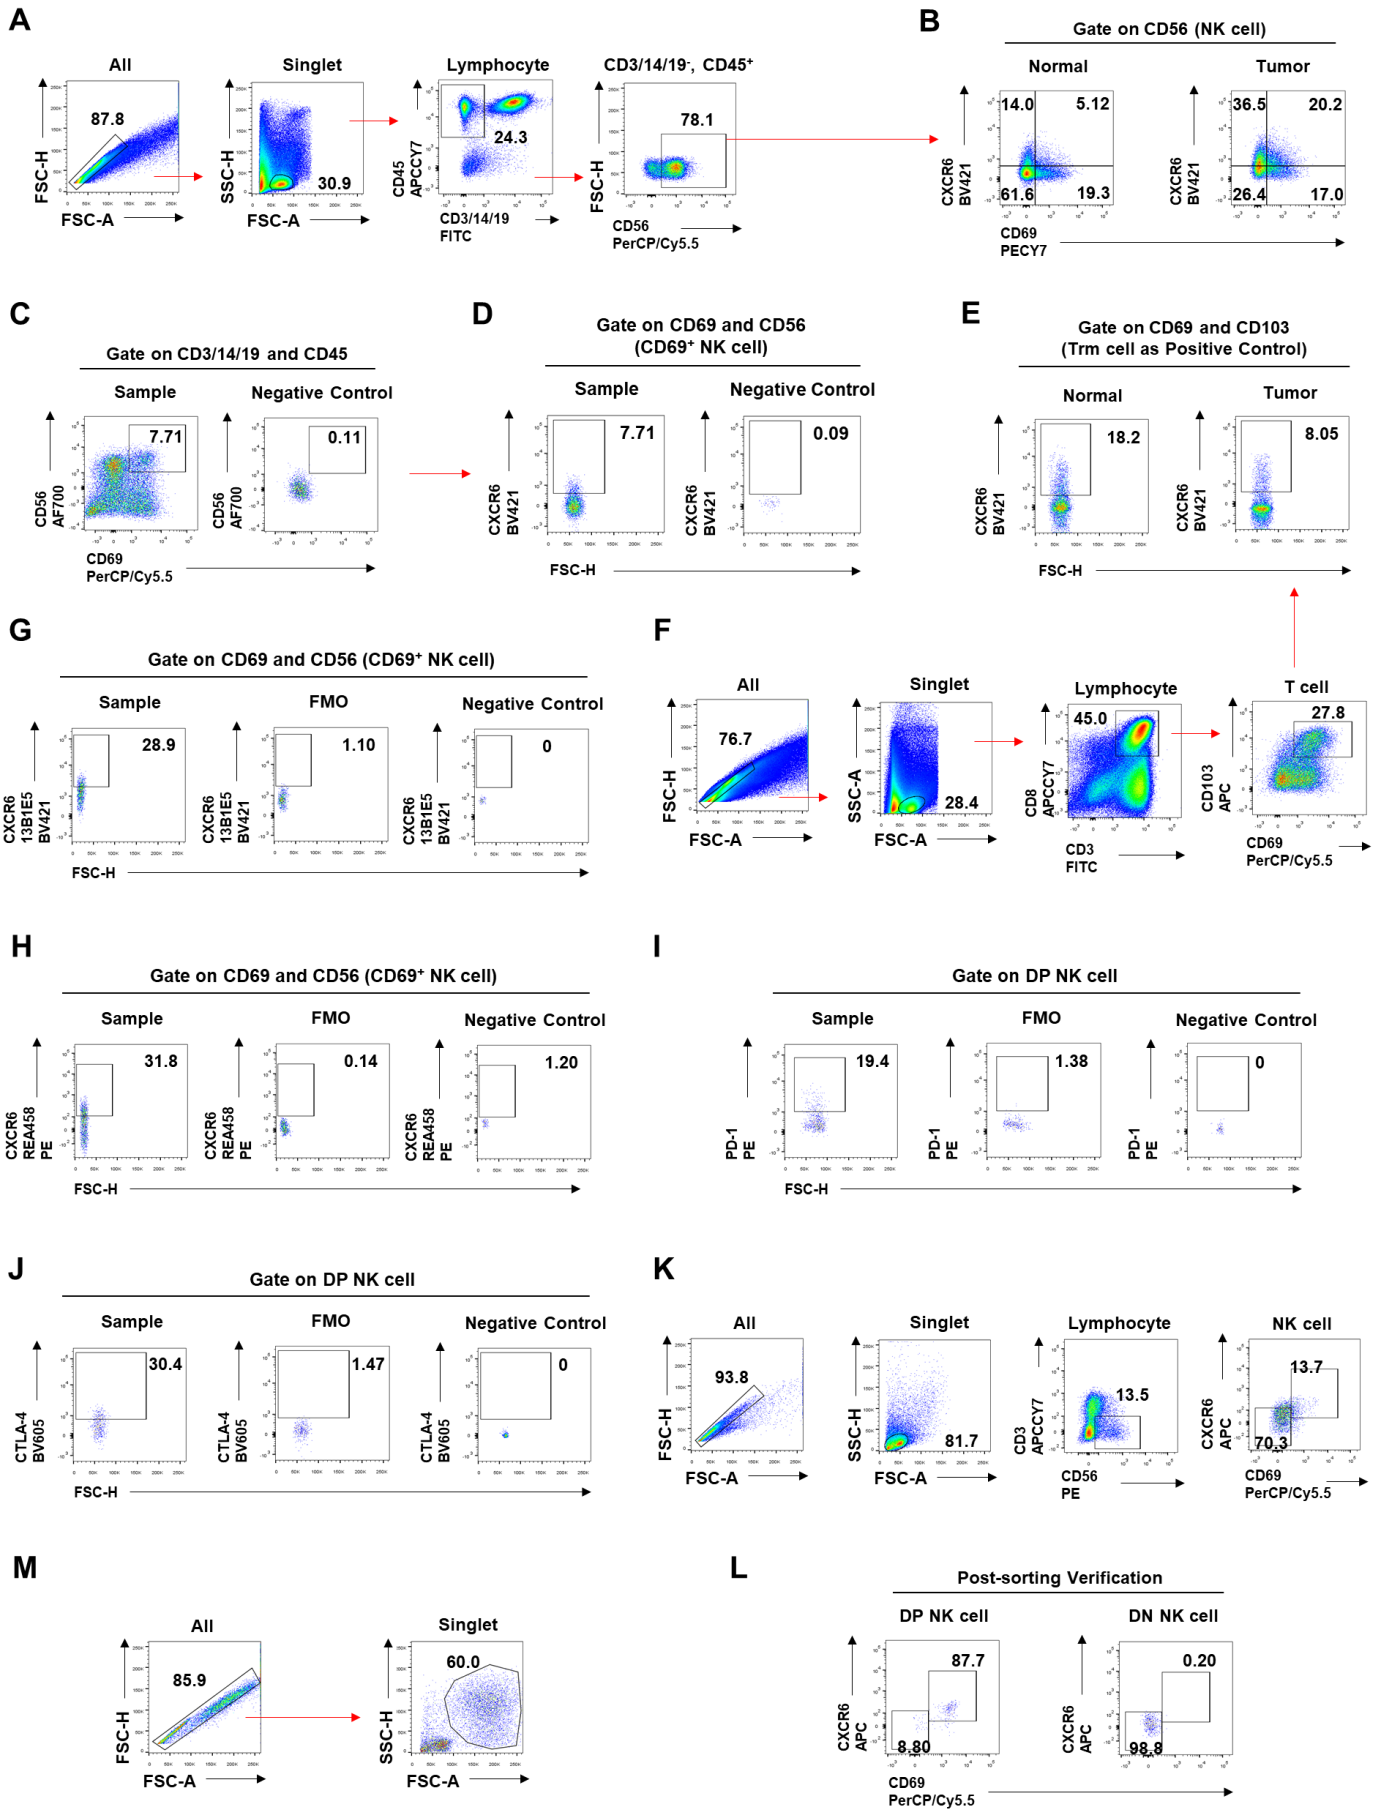

**Supplementary Figure 1 | The verifications of flow cytometry analysis**

A. The gating strategy for the flow cytometric analysis of NK cells.

B. The representative flow cytometric analysis of DP, SP, and DN NK cells.

C–D. The comparisons between the same sample and the negative control under different gates.

E–F. The representative flow cytometric analysis of CXCR6<sup>+</sup> Trm cells from the normal and tumor tissues as positive control. The gating strategy for the flow cytometric analysis of Trm cells is shown as (F).

G–H. The comparisons of the same sample stained with two fluorescence labelling antibodies of CXCR6 (clone 13B1E5 and clone REA458) among the normal stain, fluorescence minus one (FMO) and negative control.

I–J. The comparisons of the samples stained with PD-1 (I) and CTLA-4 (J) among the normal stain, FMO and negative control.

K. The representative gating strategy for the flow sorting cytometric analysis of DP and DN NK cell.

L. Post-sorting verifications of DP and DN NK cell.

M. The representative gating strategy for the flow cytometric analysis of A549 lung cancer cells.

The negative control refers to as the unstained cell suspension directly uploaded to the flow cytometry. The FMO control refers to as the cell suspension stained with all the fluorescence minus one fluorescence labelling antibody to be verified. CXCR6 refers to as the clone K041E5 unless specifically marked.

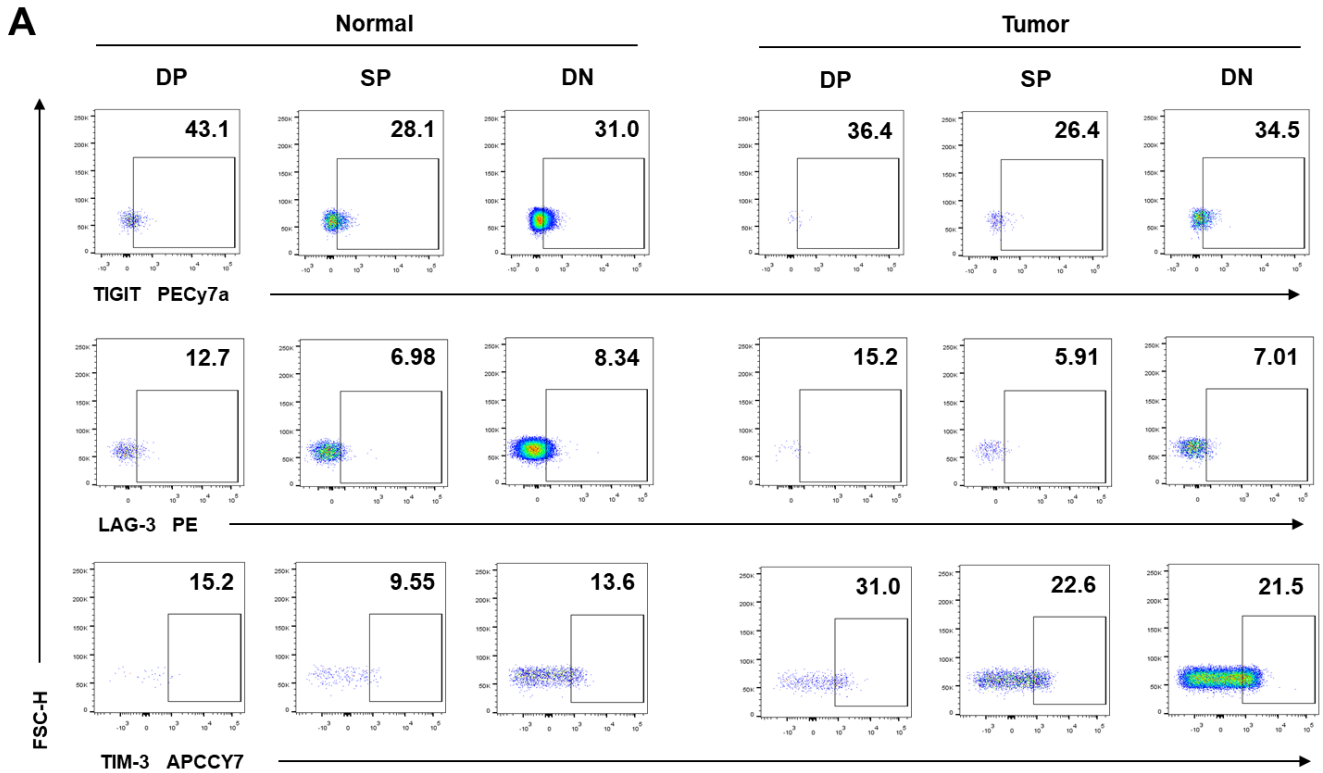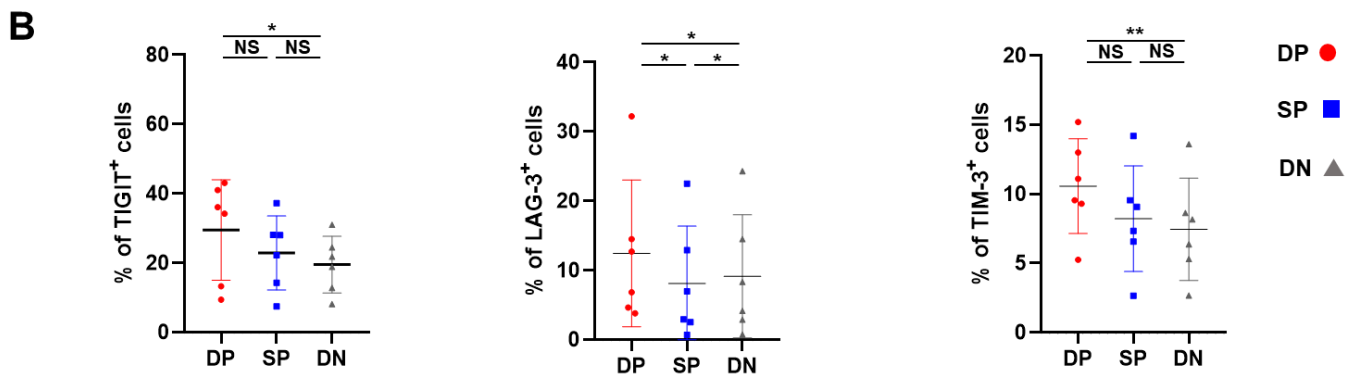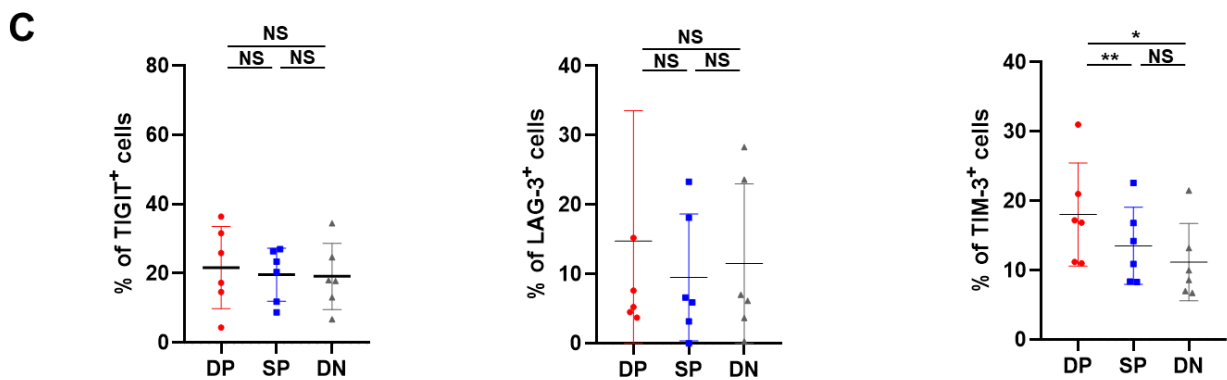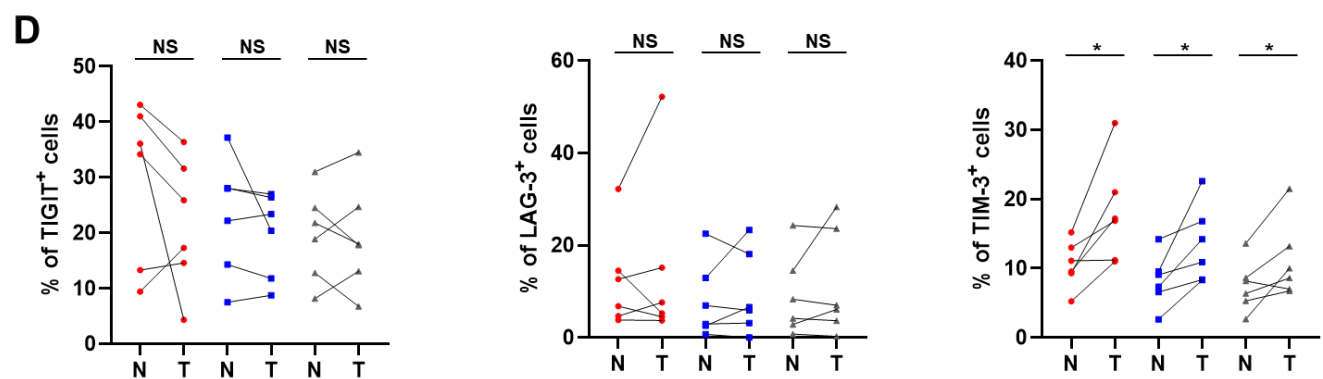

## **Supplementary Figure 2 | The exhaustion phenotype of the trNK cells in NSCLC**

The percentages of TIGIT<sup>+</sup>, LAG-3<sup>+</sup>, TIM-3<sup>+</sup> cells in DP, SP, and DN NK cells from the normal (B) and tumor tissues (C). The comparisons of the percentages of TIGIT<sup>+</sup>, LAG-3<sup>+</sup>, TIM-3<sup>+</sup> cells in DP, SP, and DN NK cells between the normal and tumor tissues (D). Data are shown as the representative flow analysis (A), mean  $\pm$  SEM (B–C), and line chart (D).

Data was obtained from the normal and paired tumor tissues resected from six of 52 operative NSCLC patients, pooled from three independent experiment. \* $p < 0.05$ , \*\* $p < 0.01$ , \*\*\* $p < 0.001$  (two-tailed t test and Wilcoxon signed rank test in B–C; two-tailed paired t test and Wilcoxon matched-pairs signed rank test in D).

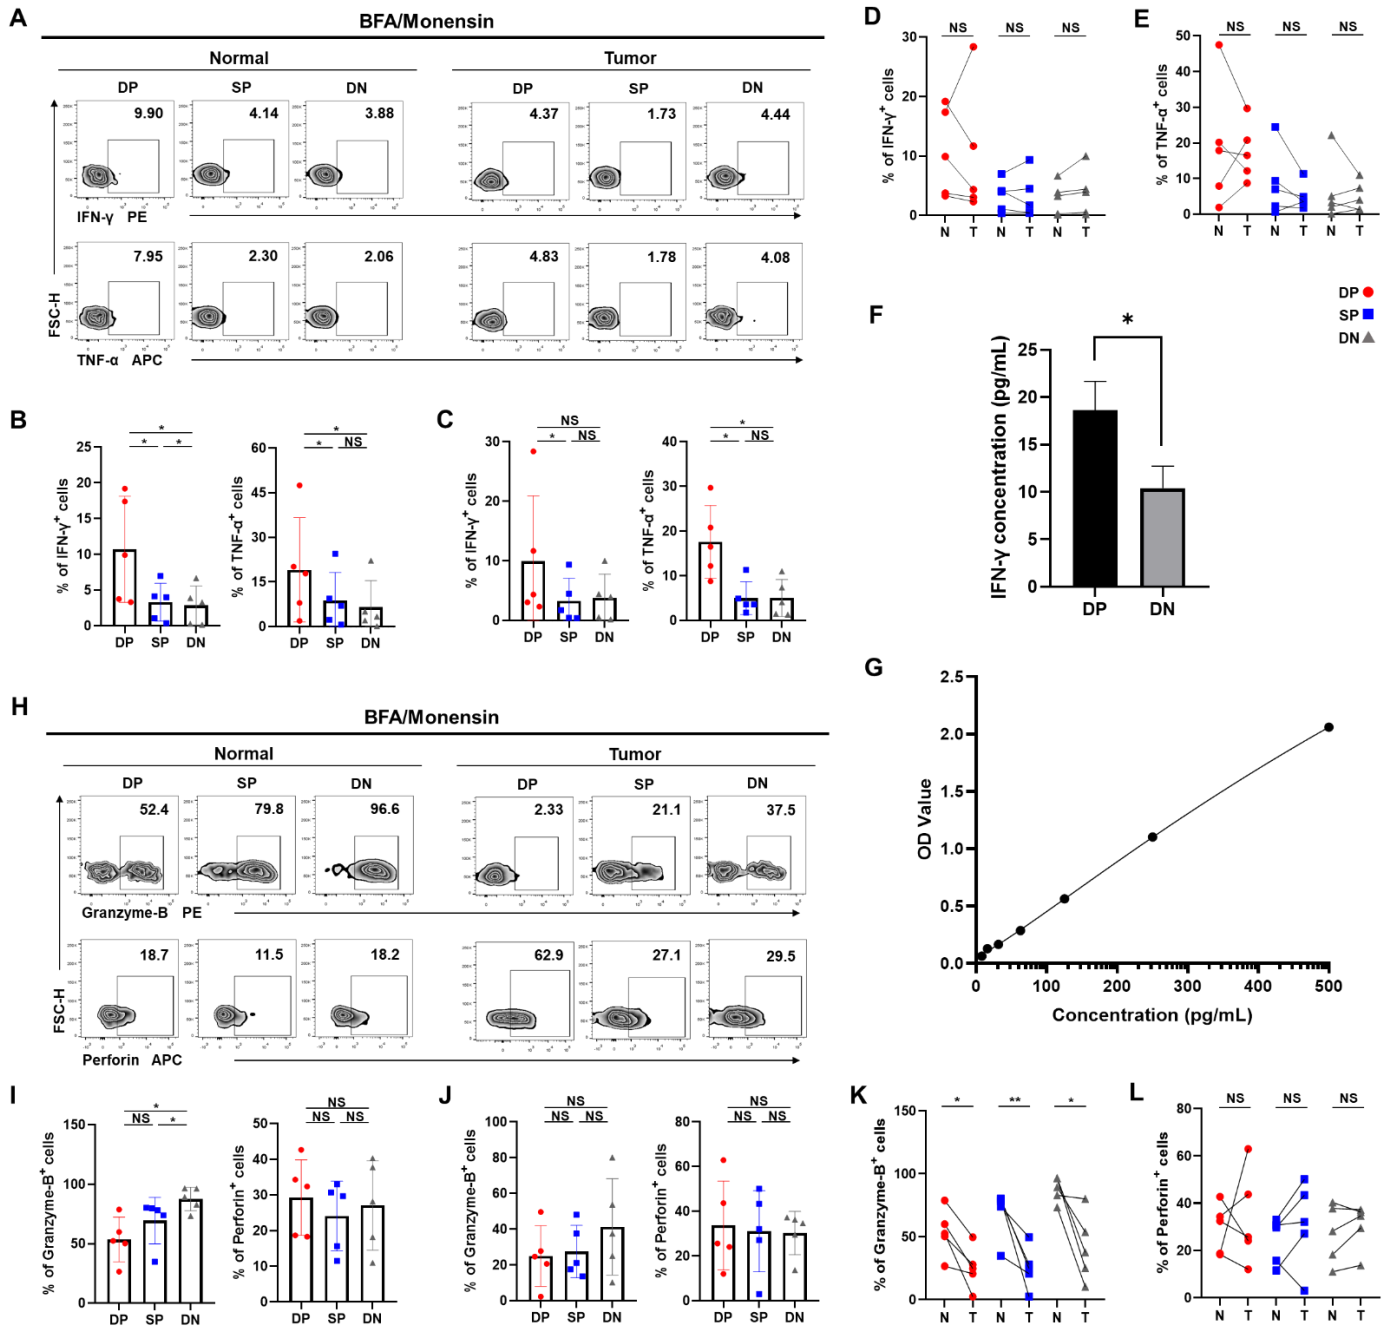

### Supplementary Figure 3 | The verifications of the trNK cells' functions in NSCLC

A–E. The percentages of IFN- $\gamma$ <sup>+</sup> and TNF- $\alpha$ <sup>+</sup> cells in DP, SP, and DN NK cells from the normal (B) and tumor tissues (C) supplemented with BFA & monensin. The comparisons of the percentages of IFN- $\gamma$ <sup>+</sup> (D) and TNF- $\alpha$ <sup>+</sup> cells (E) in DP, SP, and DN NK cells between the normal (N) and tumor (T) tissues. Data are shown as the representative flow analysis (A), mean  $\pm$  SEM (B–C), and line chart (D–E).

F–G. IFN- $\gamma$  concentration in the culture supernatant of sorted DP and DN NK cell (F) and the standard curve (G). Data are shown as mean  $\pm$  SEM and four parameter logistic curve fit.

H–L. The percentages of granzyme-B<sup>+</sup> cells and perforin<sup>+</sup> cells in DP, SP, and DN NK cells from the normal (I) and tumor tissues (J) supplemented with BFA & monensin. The comparisons of the percentages of granzyme-B<sup>+</sup> (K) and perforin<sup>+</sup> cells (L) in DP, SP, and DN NK cells between the normal (N) and tumor (T)

tissues. Data are shown as the representative flow analysis (H), mean  $\pm$  SEM (I-J), and line chart (K-L). Data was obtained from the normal and paired tumor tissues resected from five of 52 operative NSCLC patients (A-E, H-L), pooled from three independent experiments. Data was obtained from the normal tissues resected from three operative NSCLC patients (F-G), pooled from three independent experiments. Symbols represent one individual sample. \* $p < 0.05$ , \*\* $p < 0.01$ , \*\*\* $p < 0.001$  (two-tailed t test and Wilcoxon signed rank test in B-C, F, I-J; two-tailed paired t test and Wilcoxon matched-pairs signed rank test in D-E, K-L).

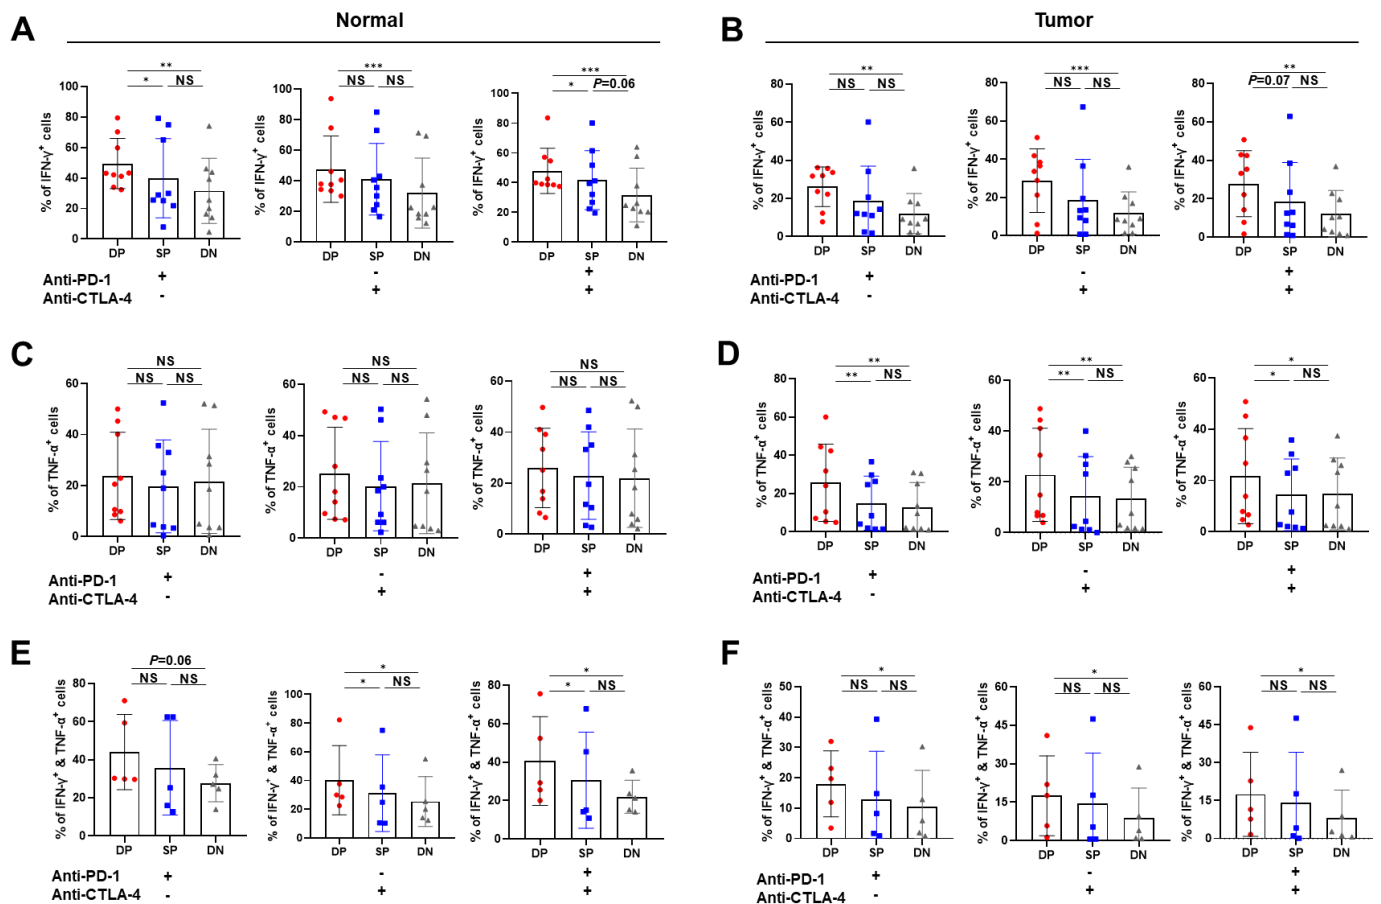

### Supplementary Figure 4 | Cytokine secretion by NK cells after the blockade(s) of PD-1 and CTLA-4 in NSCLC

A–B. The percentages of IFN- $\gamma^+$  cells in DP, SP, and DN NK cells from the normal (A) and tumor tissues (B) after the blockade(s) of PD-1 and CTLA-4. Data are shown as mean  $\pm$  SEM.

C–D. The percentages of TNF- $\alpha^+$  cells in DP, SP, and DN NK cells from the normal (C) and tumor tissues (D) after the blockade(s) of PD-1 and CTLA-4. Data are shown as mean  $\pm$  SEM.

E–F. The percentages of IFN- $\gamma^+$  and TNF- $\alpha^+$  double positive cells in DP, SP, and DN NK cells from the normal (E) and tumor tissues (F) after the blockade(s) of PD-1 and CTLA-4. Data are shown as mean  $\pm$  SEM.

Data was obtained from the normal and paired tumor tissues resected from nine of 52 operative NSCLC patients, pooled from three independent experiments. Symbols represent one individual sample. \* $p < 0.05$ , \*\* $p < 0.01$ , \*\*\* $p < 0.001$  (two-tailed t test and Wilcoxon signed rank test).

| <b>Characteristics</b>   |        | <b>n = 52</b> |
|--------------------------|--------|---------------|
| Age, mean (range)        |        | 64 (51-83)    |
| Male, n (%)              |        | 26 (50.0)     |
| Smoking, n (%)           |        | 18 (34.6)     |
| TNM stage, n (%)         | I      | 40 (76.9)     |
|                          | II     | 7 (13.5)      |
|                          | III    | 5 (9.62)      |
|                          | IV     | 0             |
| Histological type, n (%) | LUAD   | 40 (76.9)     |
|                          | LUSC   | 7 (13.5)      |
|                          | Others | 5 (9.62)      |

### **Supplementary Table 1 | Characteristics of NSCLC patients**

TNM stage is according to IASLC cancer staging manual (8th version). The information on eight normal lung tissue donators is not listed in this table.

Abbreviations: NSCLC: non-small-cell lung cancer; LUAD: lung adenocarcinoma; LUSC: squamous cell lung carcinoma.



| <b>Marker</b> | <b>Fluorochrome</b>  | <b>Clone</b> | <b>Company</b>  |
|---------------|----------------------|--------------|-----------------|
| CD3           | FITC                 | UCHT1        | Biolegend       |
| CD3           | Brilliant Violet 421 | UCHT1        | Biolegend       |
| CD3           | APC/Cyanine7         | UCHT1        | Biolegend       |
| CD8           | APC/Cyanine7         | HIT8a        | Biolegend       |
| CD14          | FITC                 | HCD14        | Biolegend       |
| CD14          | Brilliant Violet 421 | HCD14        | Biolegend       |
| CD19          | FITC                 | HIB19        | Biolegend       |
| CD19          | Brilliant Violet 421 | HIB19        | Biolegend       |
| CD45          | APC/Cyanine7         | HI30         | Biolegend       |
| CD45          | PerCP/Cyanine5.5     | HI30         | Biolegend       |
| CD45          | PE-Texas Red         | HI30         | Thermo Fisher   |
| CD56          | PE                   | 5.1H11       | Biolegend       |
| CD56          | AlexaFluor700        | 5.1H11       | Biolegend       |
| CD56          | PerCP/Cyanine5.5     | 5.1H11       | Biolegend       |
| CD69          | Brilliant Violet 510 | FN50         | Biolegend       |
| CD69          | PE/Cyanine7          | FN50         | Biolegend       |
| CD69          | PerCP/Cyanine5.5     | FN50         | Biolegend       |
| CXCR6         | APC                  | K041E5       | Biolegend       |
| CXCR6         | Brilliant Violet 421 | K041E5       | Biolegend       |
| CXCR6         | Brilliant Violet 421 | 13B1E5       | BD Horizon      |
| CXCR6         | PE                   | REA458       | Miltenyi Biotec |
| IFN- $\gamma$ | PE                   | B27          | Biolegend       |
| IFN- $\gamma$ | FITC                 | B27          | Biolegend       |
| IFN- $\gamma$ | PE/Cyanine7          | B27          | Biolegend       |
| TNF- $\alpha$ | PE                   | MAb11        | Biolegend       |
| TNF- $\alpha$ | APC                  | MAb11        | Biolegend       |
| TNF- $\alpha$ | PE/Cyanine7          | MAb11        | Biolegend       |
| CD107a        | PE                   | H4A3         | Biolegend       |
| Granzyme-B    | PE                   | QA16A02      | Biolegend       |
| Granzyme-B    | PerCP/Cyanine5.5     | QA16A02      | Biolegend       |
| Perforin      | APC                  | B-D48        | Biolegend       |
| CD103         | PE                   | Ber-ACT8     | Biolegend       |
| CD103         | APC                  | Ber-ACT8     | Biolegend       |
| CD103         | PerCP/Cyanine5.5     | Ber-ACT8     | Biolegend       |
| CD16          | APC/Cyanine7         | 3G8          | Biolegend       |
| CD16          | Brilliant Violet 510 | 3G8          | Biolegend       |
| CD16          | FITC                 | 3G8          | Biolegend       |

| <b>Marker</b> | <b>Fluorochrome</b>  | <b>Clone</b> | <b>Company</b>  |
|---------------|----------------------|--------------|-----------------|
| NKG2A         | APC                  | REA110       | Miltenyi Biotec |
| CD57          | PE                   | HCD57        | Biologend       |
| CTLA-4        | Brilliant Violet 605 | BNI3         | Biologend       |
| PD-1          | PE                   | EH12.2H7     | Biologend       |
| PD-1          | APC                  | EH12.2H7     | Biologend       |
| PD-1          | Brilliant Violet 421 | EH12.2H7     | Biologend       |
| TIGIT         | PE/Cyanine7          | A15153G      | Biologend       |
| LAG-3         | PE                   | 7H2C65       | Biologend       |
| TIM-3         | APC/Cyanine7         | F38-2E2      | Biologend       |

**Supplementary Table 2** | Information on the fluorescence labelling antibodies used in flow cytometric analysis
